# Supplementary material for: Morphological and molecular characterization of Belondira khorramshahii sp. n. (Dorylaimida: Belondiridae) from Iran
Source: Research Square preprint supplement (doi:10.21203/rs.3.rs-4159622/v1), 2024-03-28
Supplement: Supplementary file 1 [file 3b8ef9e244e4c85a9af24cd1.docx]

**Table 3** Main morphometrics of Belondira khorramshahii sp. n. and three population of B. tarjani Ferris, Ferris & Goseco, 1983

| population | Iran1 | | Egypt2 | Spain3 | India4 |
| --- | --- | --- | --- | --- | --- |
|  | Female | Male | Female | Female | Female |
| n | 6 | 3 | 6 | 13 | 6 |
| L | 1.23-1.36 | 1.04-1.14 | 1.04-1.20 | 1.00-1.25 | 0.80-1.00 |
| a | 43.0-48.0 | 44-49 | 40.6-50 | 36.8-44.5 | 40-42 |
| b | 4.8-5.4 | 4.7-4.8 | 4.5-5.4 | 4.4-5.3 | 5 |
| c | 38.0-46.0 | 33-39 | 46-54 | 47-56 | 45-56 |
| c’ | 1.2-1.4 | 1.3-1.6 | 1-1.3 | - | 1-1.4 |
| V | 33-36 | - | 35-39 | 32.3-38.4 | 34-35 |
| G1 | 3.3-4.5 | - |  | 1.2-2.5 | 1-2 |
| G2 | 11.0-15.7 | - |  | 11.4-29.0 | 9-16 |
| Lip region diam. | 6.6-8.0 | 6.5-6.8 | 5 | 6.0-6.5 | - |
| Odontostyle length | 4.5-5.5 | 4.0-5.0 | 5 | 5-6 | 4-5 |
| Neck length | 246-260 | 220-240 | 202-252 | 231-258 | 170-194 |
| Pharynx expansion length | 102-107 | 84.0-92.0 | 88-102 | 106-138 | 76-88 |
| Body diam. at mid body | 27.4-29 | 23-24 | 24-26 | 27-33 | - |
| Anterior genital branch | 45-55.5 | - | 13* | 6* | - |
| Prerectum | 75-110 | - | 48-56 | 69-103 | 54-75 |
| Tail length | 28.5-33.5 | 30.5-34.0 | 21-24 | 20-25 | 15-22 |
| Spicule length | - | 30.0-34.0 | - | - | - |
| Ventromedian supplements | - | 3 | - | - | - |

1. Present paper; 2- Ferris, Ferris and Goseco 1983; 3- Peralta and Peña-Santiago 1996; 4- Dhanam and Jairajpuri 1998.

*Calculated from image.
