# Supplementary material for: Morphological and molecular characterization of Belondira khorramshahii sp. n. (Dorylaimida: Belondiridae) from Iran
Source: Research Square preprint supplement (doi:10.21203/rs.3.rs-4159622/v1), 2024-03-28
Supplement: Supplementary file 2 [file 8a39baff39ac58f2aa68cb71.docx]

**Table 2** Main morphometrics of Belondira khorramshahii sp. n. and four population of B. apitica Thorne, 1939

| population | Iran1 | | Costa Rica2 | India3 | | U.S.A4 | | India4 | |
| --- | --- | --- | --- | --- | --- | --- | --- | --- | --- |
|  | Female | Male | Female | Female | Male | Female | Male | Female | Male |
| n | 6 | 3 | 3 | 4 | 2 | 2 | 1 | 4 | 2 |
| L | 1.23-1.36 | 1.04-1.14 | 2.23-2.35 | 1.70-1.95 | 1.75-1.67 | 1.99, 2.05 | 1.84 | 1.76-2.08 | 1.74, 1.89 |
| a | 43.0-48.0 | 44-49 | 40-48 | 37.2-44.4 | 43.9-41.8 | 36.8, 34.7 | 44.2 | 39.2-46.4 | 49.4, 59 |
| b | 4.8-5.4 | 4.7-4.8 | 5.4-5.7 | 4.7-5.6 | 4.7-4.4 | 4.6, 4.6 | 4.8 | 3.5-5.4 | 4.7, 4.5 |
| c | 38.0-46.0 | 33-39 | 114-140 | 81-93 | 70.2-69.6 | 104.7, 116 | 97 | 110-118 | 108.7, 118 |
| c’ | 1.2-1.4 | 1.3-1.6 | 0.52-0.86 | 0.7-0.8 | 1.0 | - |  |  |  |
| V | 33-36 | - | 32-34 | 34-37 | - | 34.9, 35 | - | 32-36 | - |
| G1 | 3.3-4.5 | - | - | 4.1-5.0 | - | 5, 6 | - | 3-6 | - |
| G2 | 11.0-15.7 | - | 12-22 | 12-14 | - | 16, 17 | - | 18-23 | - |
| Lip region diam. | 6.6-8.0 | 6.5-6.8 | 8-10 | 8-9 | 8 , 9 | - | - | - | - |
| Odontostyle length | 4.5-5.5 | 4.0-5.0 | 10-11 | 5-6 | 7 , 6 | - | - | - | - |
| Neck length | 246-260 | 220-240 | 399-426 | 344-367 | 374, 377 | 429, 444 | 384 | 385-518 | 370, 414 |
| Pharynx expansion length | 102-107 | 84.0-92.0 | 201-230 | 175-205 | 197, 198 | 249, 246 | 222 | 192-288 | 176, 224 |
| Body diam. at mid body | 27.4-29 | 23-24 | - | 43-48 | 40 | 54, 59 | 41.6 | 45-45 | 32, 35 |
| Anterior genital branch | 45-55.5 | - | - | 80-95 | - | - | - | - | - |
| Tail length | 28.5-33.5 | 30.5-34.0 | 16-19 | 21-23 | 25 , 24 | 19, 17.6 | 19 | 16-18 | 16-16 |
| Spicule length | - | 30.0-34.0 | - | - | 40 , 37 | - | 38.4 |  | 41.6, 40 |
| Ventromedian supplements | - | 3 | - | - | 2 | - |  | - | 2 |

1- Present paper; 2- Shaheen and Ahmad 2005; 3- Kumar and Ahmad 2023; 4- Ferris, Ferris and Goseco 1983.
